# Supplementary material for: Rad17 Translocates to Nucleolus upon UV Irradiation through Nucleolar Localization Signal in the Central Basic Domain
Source: MDPI journal article supplement (doi:10.3390/ijms232012300), 2022-10-14
Supplement: s1 [file s1]

## Supplemental Figure S1

### A means $\pm$ standard deviation

|      | Nucleolus     |                 | Cytosol       |                 |
|------|---------------|-----------------|---------------|-----------------|
|      | mean $\pm$ SD | <i>p</i> -value | mean $\pm$ SD | <i>p</i> -value |
| WT   | 149 $\pm$ 28  | < 0.001         | 10 $\pm$ 10   | < 0.001         |
| 5KR  | 101 $\pm$ 12  | NS              | 42 $\pm$ 15   | < 0.001         |
| EGFP | 97 $\pm$ 21   | NS              | 129 $\pm$ 87  | NS              |

### B *p*-values of *t*-test

|           | WT      | 5KR     | EGFP    | Cytosol |
|-----------|---------|---------|---------|---------|
| WT        |         | < 0.001 | < 0.001 |         |
| 5KR       | < 0.001 |         | < 0.001 |         |
| EGFP      | < 0.001 | NS      |         |         |
| Nucleolus |         |         |         |         |

### C means $\pm$ standard deviation

|                 | Nucleolus     |                 | Cytosol       |                 |
|-----------------|---------------|-----------------|---------------|-----------------|
|                 | mean $\pm$ SD | <i>p</i> -value | mean $\pm$ SD | <i>p</i> -value |
| WT              | 153 $\pm$ 27  | < 0.001         | 6 $\pm$ 7     | < 0.001         |
| K362A/<br>K363A | 120 $\pm$ 16  | < 0.001         | 13 $\pm$ 9    | < 0.001         |
| K359A/<br>R360A | 110 $\pm$ 17  | 0.002           | 33 $\pm$ 15   | < 0.001         |

### D *p*-values of *t*-test

|                 | WT      | K362A/<br>K363A | K359A/<br>R360A | Cytosol |
|-----------------|---------|-----------------|-----------------|---------|
| WT              |         | < 0.001         | < 0.001         |         |
| K362A/<br>K363A | < 0.001 |                 | < 0.001         |         |
| K359A/<br>R360A | < 0.001 | 0.011           |                 |         |
| Nucleolus       |         |                 |                 |         |

### E means $\pm$ standard deviation

|     | Nucleolus     |                 | Cytosol       |                 |
|-----|---------------|-----------------|---------------|-----------------|
|     | mean $\pm$ SD | <i>p</i> -value | mean $\pm$ SD | <i>p</i> -value |
| WT  | 149 $\pm$ 28  | < 0.001         | 10 $\pm$ 10   | < 0.001         |
| 3SD | 121 $\pm$ 27  | < 0.001         | 9 $\pm$ 7     | < 0.001         |

### F *p*-values of *t*-test (WT & 3SD)

|           |       |
|-----------|-------|
| Nucleolus | 0.002 |
| Cytosol   | NS    |

## Figure S1.

(A, C, E) Table shows the means  $\pm$  standard deviation of the graphs in Figures 2B, 2C, and 2E. The *p*-values were calculated by one sample *t*-test. The signal intensity in the nucleoplasm was used as 100% control.

(B, D, F) Table shows the *p*-values of the Student's or Welch's *t*-test. WT and mutants were compared in terms of EGFP signal intensities in the nucleolus and the cytosol.
